# Supplementary material for: Carbothermal reduction-induced oxygen vacancies in spinel cathodes for high-performance aqueous zinc-ion batteries
Source: Royal Society of Chemistry journal article supplement (doi:10.1039/d4ta02718c), 2024-01-01
Supplement: d4ta02718c1.pdf [file d4ta02718c1.pdf]

**Electronic Supplementary Information (ESI)**

**Carbothermal Reduction-Induced Oxygen Vacancy in Spinel Cathode for High-Performance Aqueous Zinc-Ion Battery**

*Saheb Bag,<sup>a</sup> Venkata Surya Kumar Choutipalli,<sup>b</sup> Abhirup Bhadra,<sup>c</sup> Kevin L. Shuford,<sup>b</sup> Dipan Kundu,<sup>c,d</sup> and C. Retna Raj<sup>\*a</sup>*

<sup>a</sup>Functional Materials and Electrochemistry Lab, Department of Chemistry Indian Institute of Technology Kharagpur, Kharagpur 721302, India

<sup>b</sup>Department of Chemistry and Biochemistry, Baylor University, One Bear Place #97348, Waco, Texas 76798-7348, United States

<sup>c</sup>School of Chemical Engineering, University of New South Wales, Sydney, Kensington, NSW 2052, Australia

<sup>d</sup>School of Mechanical & Manufacturing Engineering, University of New South Wales, Sydney, Kensington, NSW 2052, Australia

**\* Corresponding Author**

E-mail: [crraj@chem.iitkgp.ac.in](mailto:crraj@chem.iitkgp.ac.in) (C. R. Raj)

**Scheme S1.** Schematic illustration of the synthesis of  $O_V\text{-ZnV}_2\text{O}_4$ .

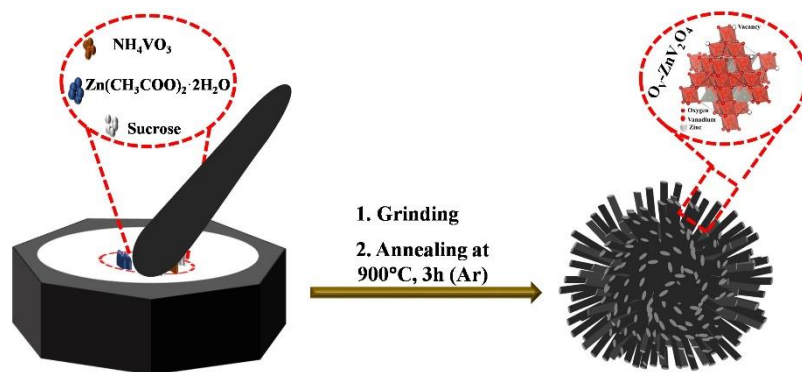

**Fig. S1** High-resolution XPS Zn 2p (a), O 1s (b), and C 1s (c) profiles of O<sub>v</sub>-ZnV<sub>2</sub>O<sub>4</sub>-200.

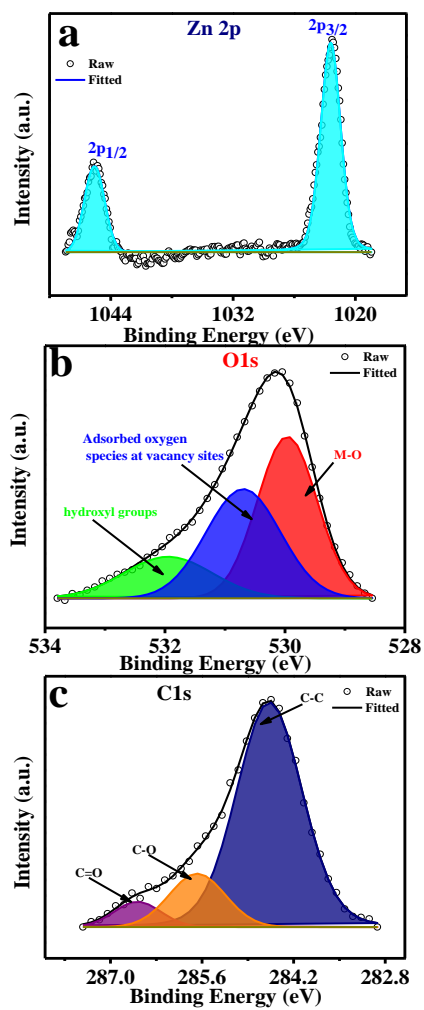

**Fig. S2** Thermogravimetric (TG) analyses illustrating the decomposition of precursors ( $\text{Zn}(\text{CH}_3\text{COO})_2 \cdot 2\text{H}_2\text{O}$ ) +  $\text{NH}_4\text{VO}_3$ ) in the absence (a) and presence (b, c) varying amounts of sucrose and the formation of (a)  $\text{O}_V\text{-ZnV}_2\text{O}_4\text{-0}$ , (b)  $\text{O}_V\text{-ZnV}_2\text{O}_4\text{-100}$ , and (c)  $\text{O}_V\text{-ZnV}_2\text{O}_4\text{-200}$ .

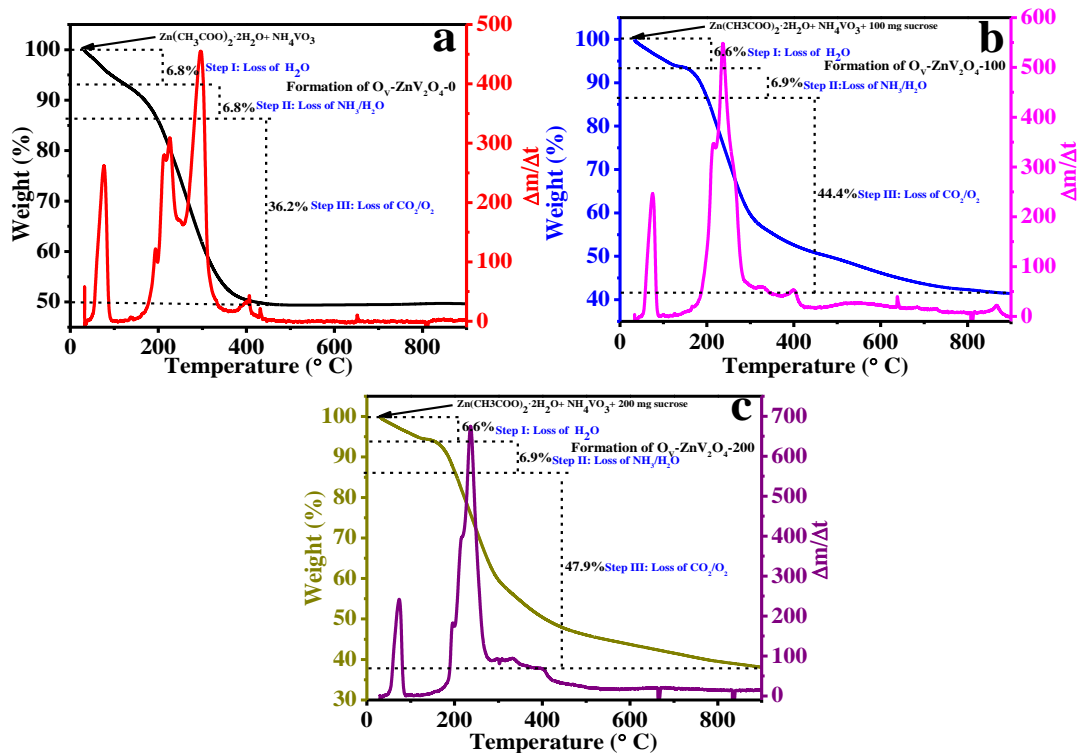

TG analyses were performed with the mixture of the precursors ( $\text{Zn}(\text{CH}_3\text{COO})_2 \cdot 2\text{H}_2\text{O}$ ) +  $\text{NH}_4\text{VO}_3$ ) in the presence of varying amounts of sucrose (0, 100, and 200 mg). Multi-step weight loss was observed in all cases. In the absence of sucrose, three distinct weight losses were observed (Fig. S2a). The second and third weight losses (200-350°C) overlap when sucrose is present. The initial weight loss in step I (<130°C) is attributed to the loss of  $\text{H}_2\text{O}$  from  $\text{Zn}(\text{CH}_3\text{COO})_2 \cdot 2\text{H}_2\text{O}$  (Fig. S2a, b and c). Step II (>130°C) corresponds to the loss of  $\text{NH}_3$  and structural  $\text{H}_2\text{O}$  due to the decomposition of  $\text{NH}_4\text{VO}_3$ .<sup>1,2</sup> The third weight loss can be attributed to the evolution of  $\text{CO}_2/\text{O}_2$  and the final stable weight plateau observed above 450°C corresponds to the formation of carbon-supported  $\text{ZnV}_2\text{O}_4$  as the final product. In the presence of sucrose, the well-defined plateau was not observed at the final stage possibly due to the presence of sucrose-derived carbon. The weight loss above 350°C in the presence of sucrose is associated with further loss of  $\text{O}_2$ . The quantitative analysis of the weight loss at various steps confirms that the final product has carbon and  $\text{O}_V\text{-ZnV}_2\text{O}_4$ . The % carbon content in the presence of sucrose is quantified to be 19.6% and 34.7% for the sample mixture analyzed in the presence of 100 and 200 mg of sucrose, respectively.

**Fig. S3** EPR spectral profile of  $O_V\text{-ZnV}_2O_4\text{-0}$ ,  $O_V\text{-ZnV}_2O_4\text{-100}$ , and  $O_V\text{-ZnV}_2O_4\text{-200}$  at room temperature.

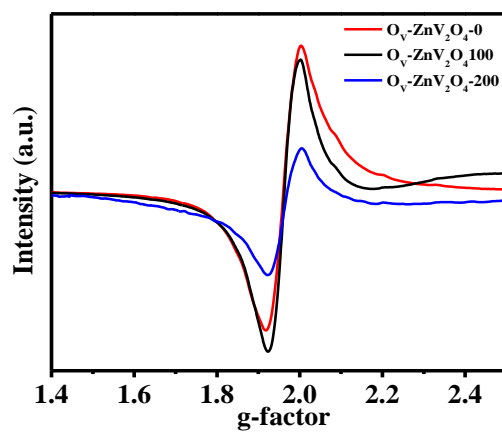

**Fig. S4** (a) High-resolution XPS V 2p profile of  $O_V\text{-ZnV}_2\text{O}_4\text{-0}$ ,  $O_V\text{-ZnV}_2\text{O}_4\text{-100}$ , and  $O_V\text{-ZnV}_2\text{O}_4\text{-200}$ . (b) The bar diagram depicts the % of different oxidation states of V.

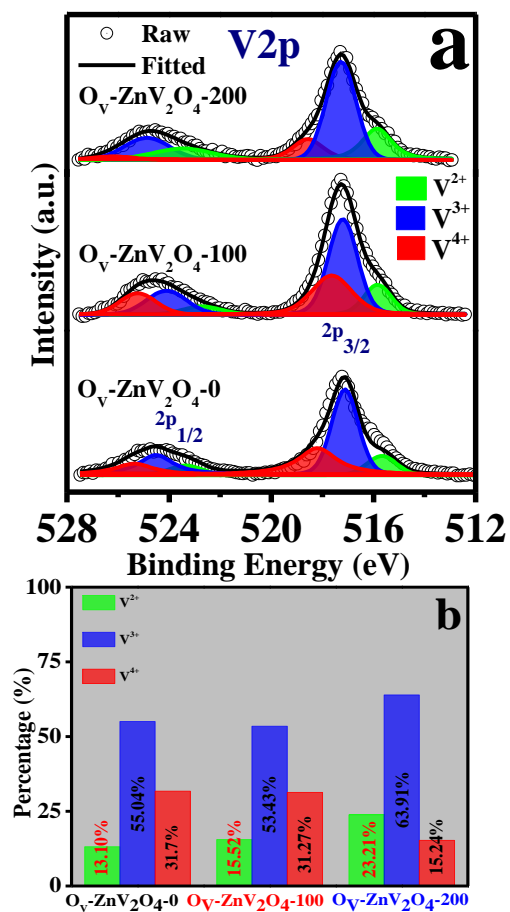

**Fig. S5** High-resolution XPS O 1s profile of  $O_v\text{-ZnV}_2\text{O}_4\text{-0}$  (a),  $O_v\text{-ZnV}_2\text{O}_4\text{-100}$  (b), and (c)  $O_v\text{-ZnV}_2\text{O}_4\text{-200}$ .

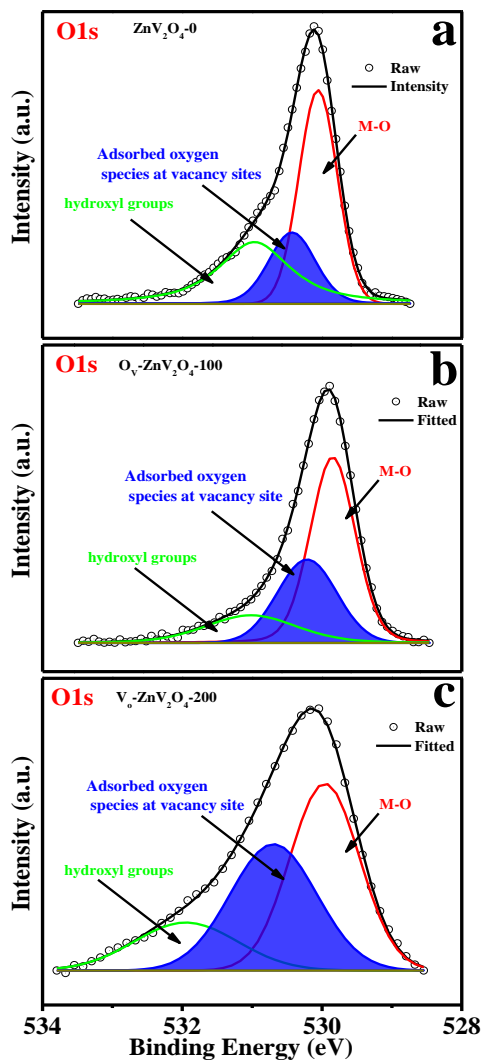

**Fig. S6** FESEM images of  $O_v\text{-ZnV}_2\text{O}_4\text{-0}$  (a),  $O_v\text{-ZnV}_2\text{O}_4\text{-100}$  (b), and (c)  $O_v\text{-ZnV}_2\text{O}_4\text{-200}$ .

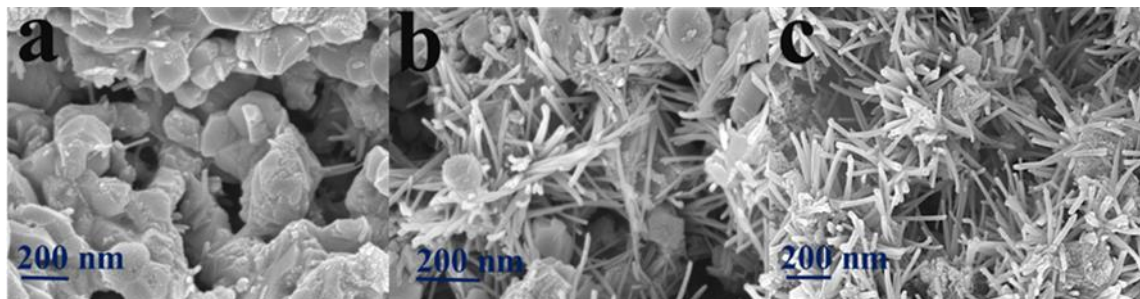



**Fig. S7** HADDF image of  $O_v\text{-ZnV}_2\text{O}_4\text{-200}$  and the corresponding STEM elemental mapping image illustrating the distribution of carbon.

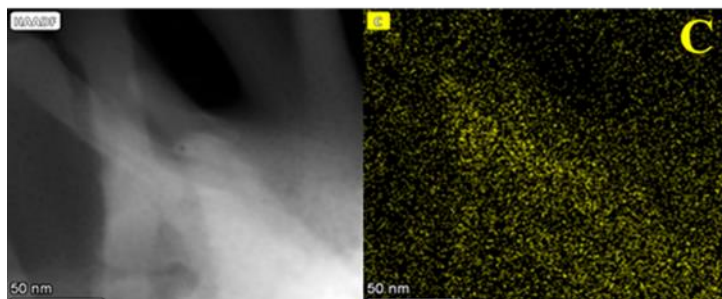

**Fig. S8** (a) Galvanostatic charge-discharge profiles obtained for Zn||O<sub>v</sub>-ZnV<sub>2</sub>O<sub>4</sub>-200 ZIB at 100 mA g<sup>-1</sup> and (b) Comparison of first charge profile at the current density of 100 and 500 mA g<sup>-1</sup>.

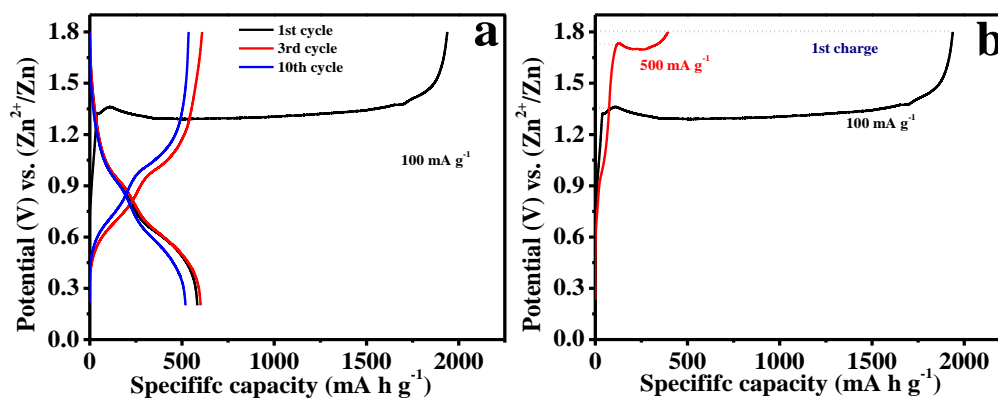

As shown in the figures, the potential-induced transformation of the cathode began at ~1.32 V at the low current density of 100 mA g<sup>-1</sup> in contrast to 1.52 V at 500 mA g<sup>-1</sup> (Fig. 3b). The conversion/transformation took a longer time at the lower current density. The cathode delivers a maximum capacity of 374.5 mAh g<sup>-1</sup> (at 500 mA g<sup>-1</sup>) after 10 charge-discharge cycles at a current density of 500 mA g<sup>-1</sup>, whereas a maximum capacity of 600.1 mAh g<sup>-1</sup> (100 mA g<sup>-1</sup>) after 3 charge-discharge cycles at 100 mA g<sup>-1</sup> was achieved. It is worth pointing out here that the specific capacity at a particular current density after activation remains the same irrespective of the current density (low or high) at which the cathode is activated.

**Fig. S9** (a) Galvanostatic charge-discharge profile of Zn||O<sub>v</sub>-ZnV<sub>2</sub>O<sub>4</sub>-200 ZIB at different current densities. Plot illustrating the cycling stability of O<sub>v</sub>-ZnV<sub>2</sub>O<sub>4</sub>-200 at the current densities of (b) 100 mA g<sup>-1</sup> and (c) 2000 mA g<sup>-1</sup>.

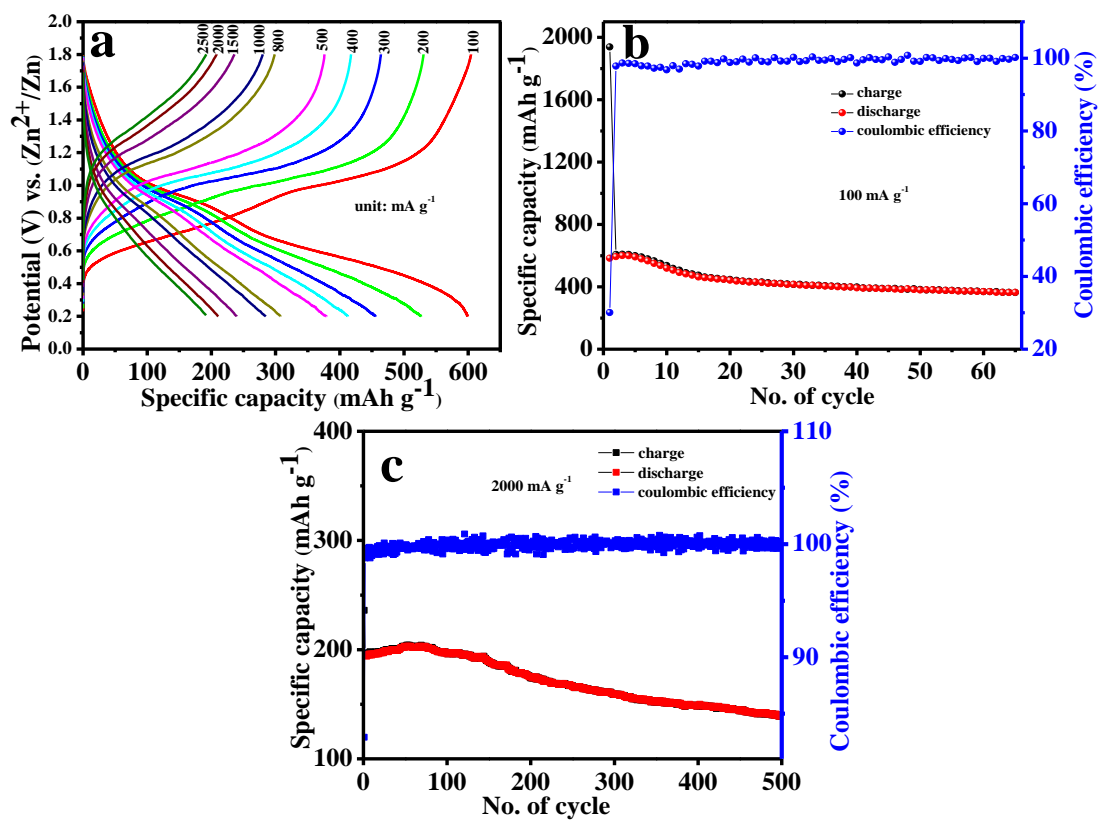

**Fig. S10** Galvanostatic charge-discharge profile (a) and plot illustrating the cycling stability of  $O_V\text{-ZnV}_2O_4\text{-0}$ ,  $O_V\text{-ZnV}_2O_4\text{-100}$ , and  $O_V\text{-ZnV}_2O_4\text{-200}$  at  $500\text{ mA g}^{-1}$  (b). (c) Nyquist plots at open circuit voltage and a table summarizing the charge transfer resistance.

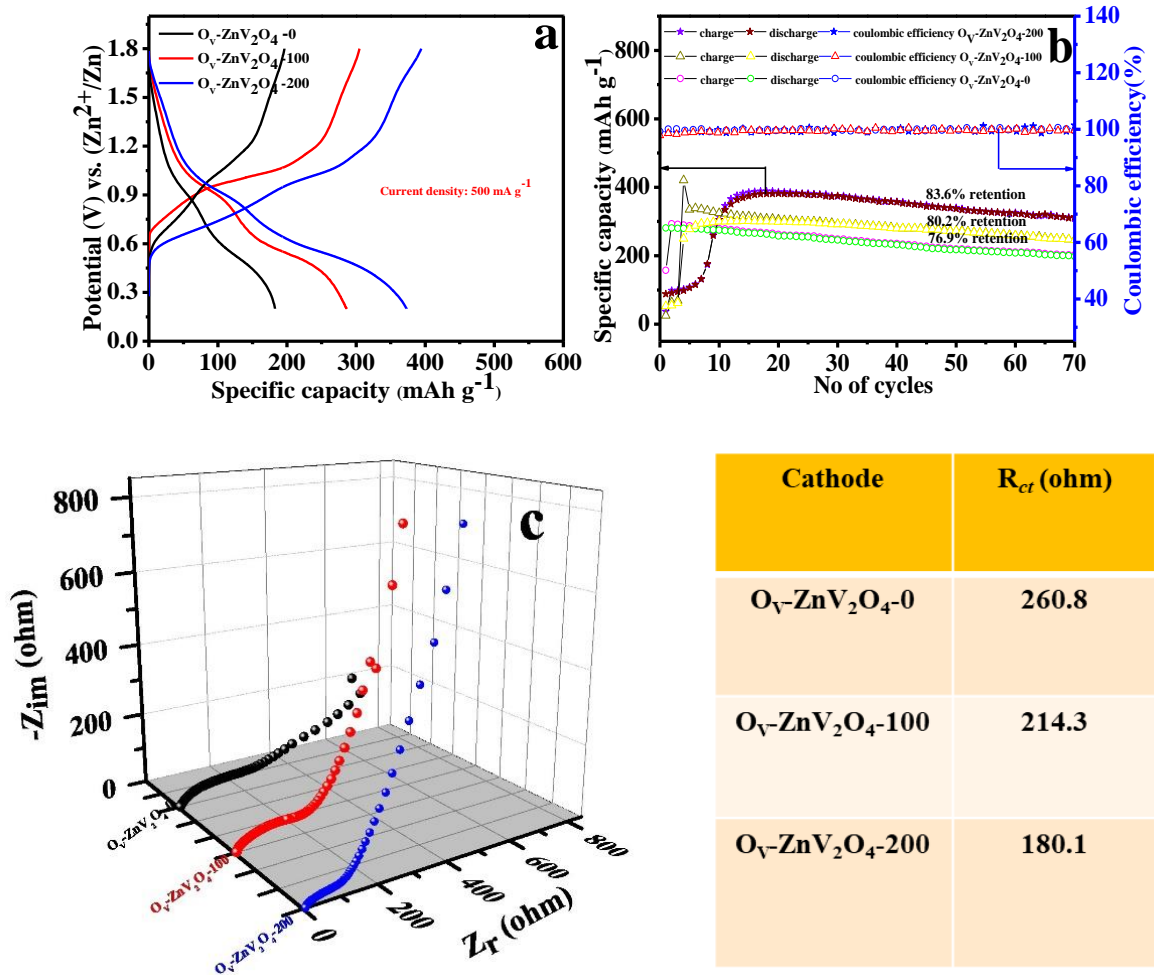

### Note S1: Analysis of Galvanostatic Intermittent Titration Technique (GITT) study

$$D = \frac{4}{\pi\tau} \left( \frac{n_m V_m}{S} \right)^2 \left( \frac{\Delta E_s}{\Delta E_t} \right)^2 \quad (1)^{3,4}$$

D is the diffusion coefficient,  $n_m$ , and  $V_m$  are the number of moles of the active material and the molar volume, respectively, and S is the contact area between the electrode and electrolyte.  $t$  is the time duration of the pulse.  $\Delta E_s$  and  $\Delta E_t$  are the quasi-equilibrium and battery voltage changes, respectively.

**Fig. S11** GITT profile of a single step during the discharge of Zn||O<sub>v</sub>-ZnV<sub>2</sub>O<sub>4</sub>-200.

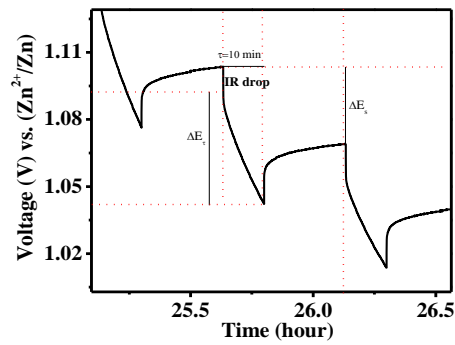

**Fig. S12** Plots illustrating the diffusion coefficient vs ion insertion state for  $\text{O}_V\text{-ZnV}_2\text{O}_4\text{-0}$  (a), and  $\text{O}_V\text{-ZnV}_2\text{O}_4\text{-100}$  (b).

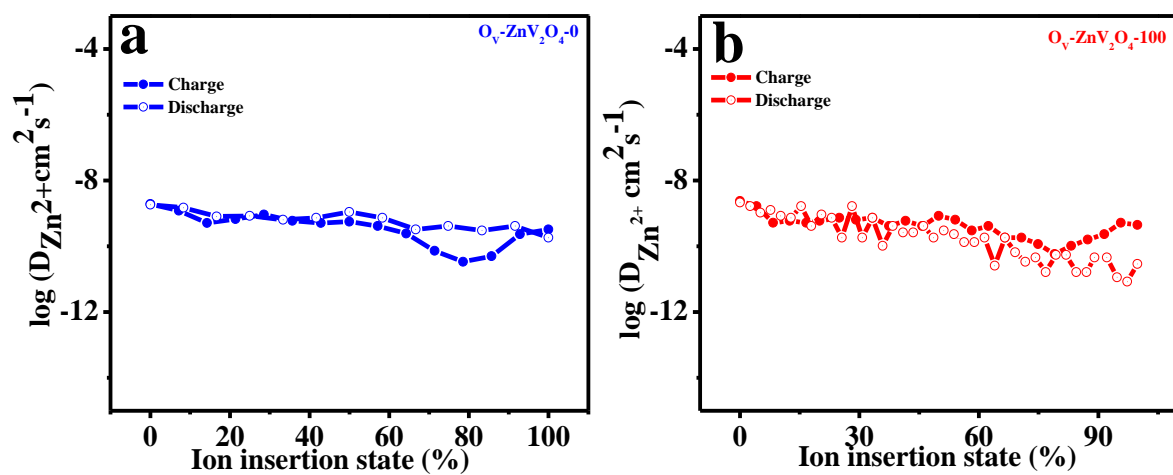

**Fig. S13** Nyquist plot at OCV (1.1 V) and after different cycles in charge state at 1.8 V (O<sub>v</sub>-ZnV<sub>2</sub>O<sub>4</sub>-200 cathode). Table summarizing the charge transfer resistance. The equivalent circuit is shown in the inset: R<sub>s</sub>: solution resistance, R<sub>ct</sub>: charge transfer resistance, CPE: constant phase element, and W: Warburg impedance.

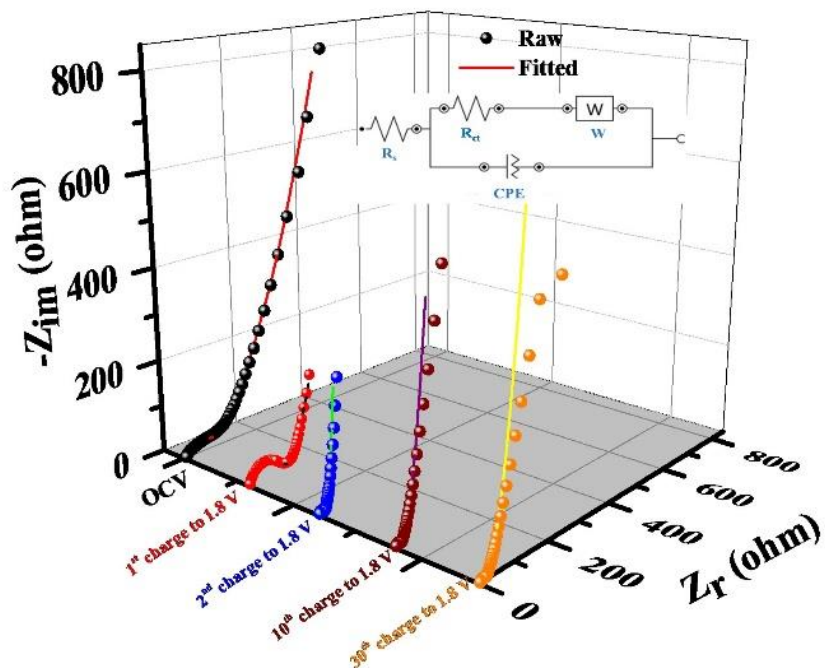

| State                            | R <sub>ct</sub> (ohm) |
|----------------------------------|-----------------------|
| OCV                              | 180.1                 |
| 1 <sup>st</sup> charge to 1.8 V  | 94.2                  |
| 2 <sup>nd</sup> charge to 1.8 V  | 14.1                  |
| 10 <sup>th</sup> charge to 1.8 V | 12.4                  |
| 30 <sup>th</sup> charge to 1.8 V | 12.1                  |

**Fig. S14** Nyquist plot at OCV (1.1 V) and after different cycles in discharge state at 0.2 V (O<sub>v</sub>-ZnV<sub>2</sub>O<sub>4</sub>-200 cathode). Table summarising the charge transfer resistance.

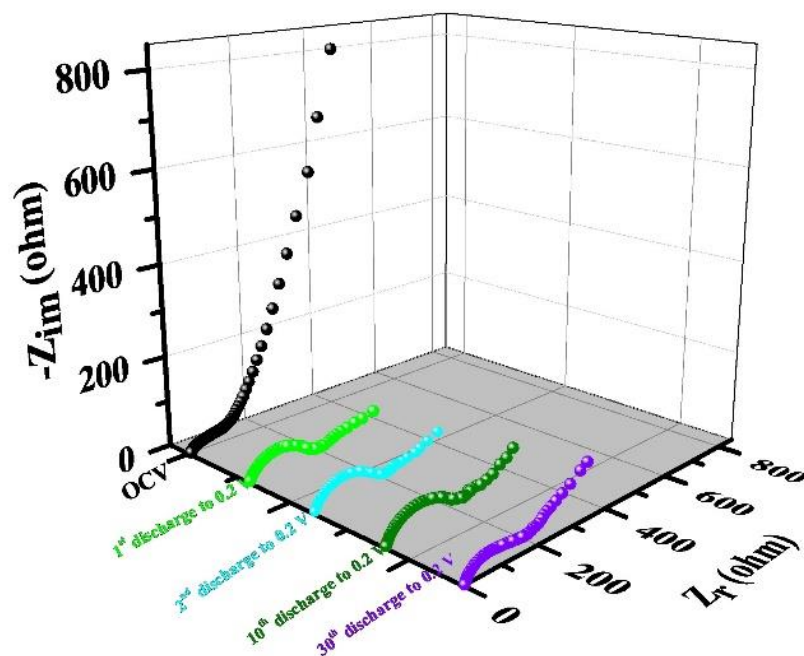

| State                               | $R_{ct}$ (ohm) |
|-------------------------------------|----------------|
| OCV                                 | 180.1          |
| 1 <sup>st</sup> discharge to 0.2 V  | 192.1          |
| 2 <sup>nd</sup> discharge to 0.2 V  | 196.2          |
| 10 <sup>th</sup> discharge to 0.2 V | 229.5          |
| 30 <sup>th</sup> discharge to 0.2 V | 205.8          |



**Fig. S15** The calculated partial density of states (PDOS) of  $O_v\text{-ZnV}_2\text{O}_4$ .

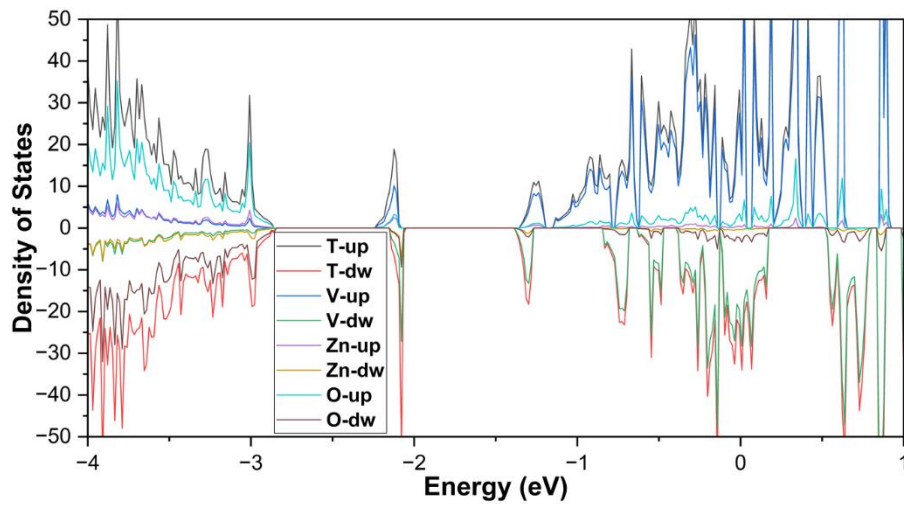

**Fig. S16**  $\text{Zn}^{2+}$  ion interaction with (a) pristine  $\text{ZnV}_2\text{O}_4$ , and (b)  $\text{O}_\text{V}$ - $\text{ZnV}_2\text{O}_4$ , and the calculated values of interaction energy. [Color code: grey sphere for Zn, red (big) sphere for V, and red (small) sphere for O].

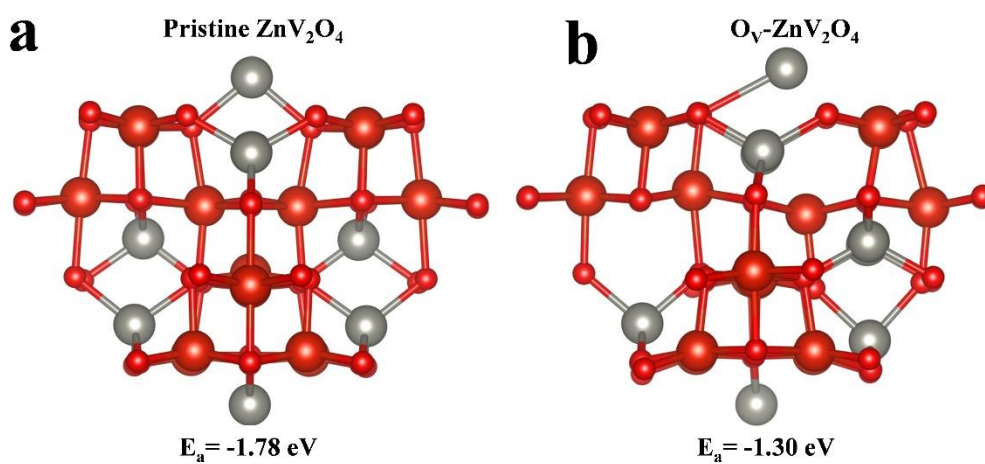

**Note S2. Limitations of our calculation:**

Our current level of theory (PBE-GGA) has limitations in accurately describing the electronic structure of systems containing transition metals, lanthanides, and actinides. To address these limitations, we recommend using advanced approaches incorporating U+V corrections. Standard DFT, particularly with local or semi-local exchange-correlation functionals like LDA or GGA, often fails to accurately describe systems with strong electron-electron correlations, such as transition metal oxides, lanthanides, and actinides. U+V corrections help account for these strong correlations by introducing on-site (U) and inter-site (V) Coulomb interactions. The Hubbard U term corrects the self-interaction error in DFT, better describing the localized d or f electrons in transition metals and rare earth elements. It effectively increases the energy gap and corrects the electronic structure by accounting for electron-electron repulsion within the same atomic site. The inter-site V term extends the correction to include interactions between electrons on different sites, crucial for materials where electron correlation effects involve neighboring atoms or ions.

By including U+V corrections, DFT can more accurately predict electronic properties such as band gaps, magnetic moments, and charge transfer insulators, often underestimated by standard DFT methods.

**Fig. S17** Cyclic voltammograms of  $\text{O}_v\text{-ZnV}_2\text{O}_4\text{-0}$ ,  $\text{O}_v\text{-ZnV}_2\text{O}_4\text{-100}$ , and  $\text{O}_v\text{-ZnV}_2\text{O}_4\text{-200}$ .

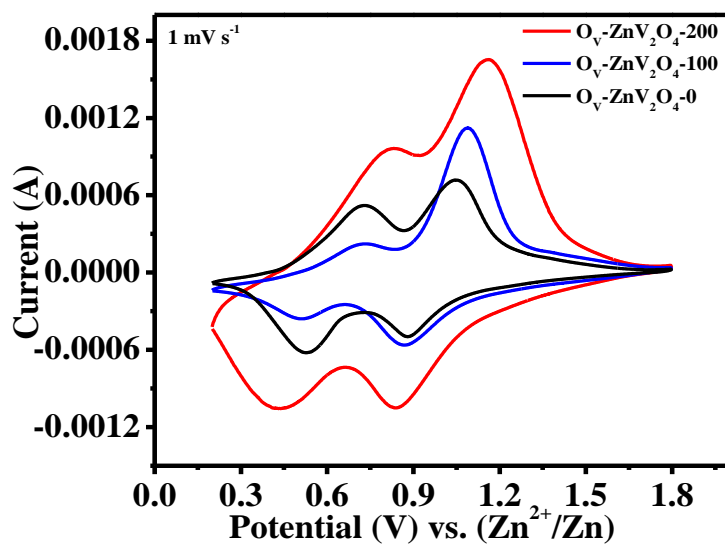

**Note S3: Determining the capacitive and diffusion-controlled contributions:**

The voltammogram was quantitatively analysed to understand the  $Zn^{2+}$  storage kinetics according to the eqn (1).<sup>5</sup>

$$i = av^b \quad (1)$$

where, 'a' and 'b' are the adjustable parameters and the value of b ranges from 0.5 to 1.0. The b-value is obtained from  $\log(i)$ - $\log(v)$  plots and the value of 'b' for the four peaks A, B, C and D are calculated to be 0.63, 0.69, 0.71 and 0.67, respectively, suggesting a diffusion-dominated process. The capacitive contribution is further calculated according to the following eqn (2)

$$i = k_1 + k_2v^{1/2} \quad (2)$$

where, i refers to current (mA), the  $k_1$  and  $k_2$  are two potential dependent constant and  $v$  the scan rate  $mV s^{-1}$ . The  $k_1$  and  $k_2$  were calculated by plotting  $i$  vs.  $v^{1/2}$  and  $k_1v$  and  $k_2v^{1/2}$  correspond to the contribution from the capacitive and diffusion control process, respectively.

**Fig. S18** Cyclic voltammograms at different scan rates (a), plot illustrating b-value and  $\log(i)$ - $\log(v)$  plot (b), cyclic voltammogram illustrating the capacitive contribution at the scan rate of  $1 \text{ mV s}^{-1}$  (c), and plot illustrating the capacitive and diffusion-controlled contribution at various scan rate (d).

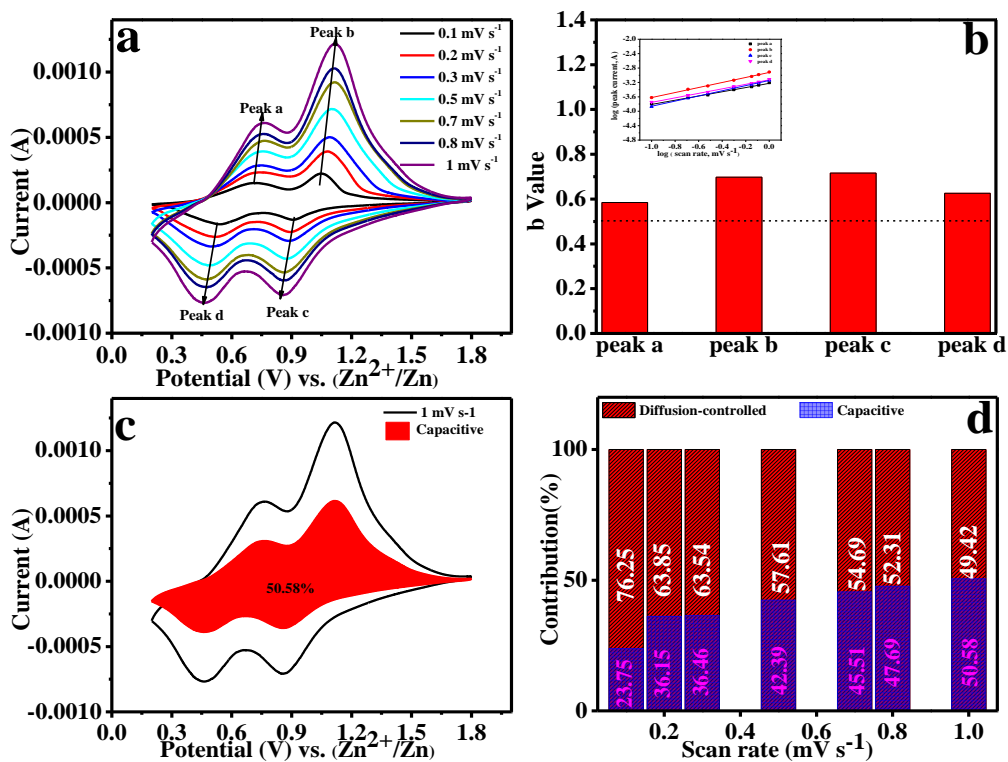

**Fig. S19** Capacitive and diffusion-controlled current contribution at  $1 \text{ mV s}^{-1}$  of  $\text{O}_V\text{-ZnV}_2\text{O}_4$ -0,  $\text{O}_V\text{-ZnV}_2\text{O}_4$ -100, and  $\text{O}_V\text{-ZnV}_2\text{O}_4$ -200.

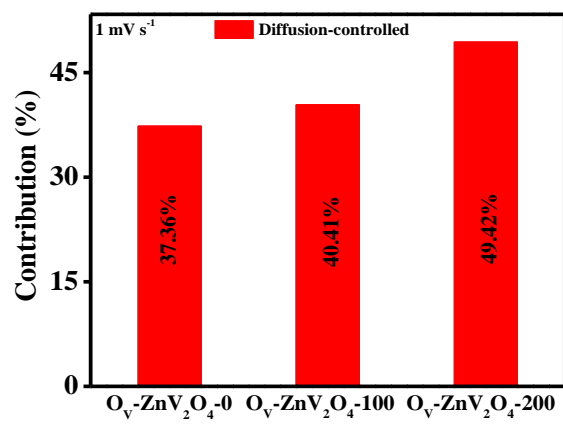

**Fig. S20** (a) High-resolution ex-situ XPS V 2p profile of O<sub>v</sub>-ZnV<sub>2</sub>O<sub>4</sub>-200 at different charge and discharge states. (b) The bar chart represents the % of different oxidation states of V at different states of charge-discharge.

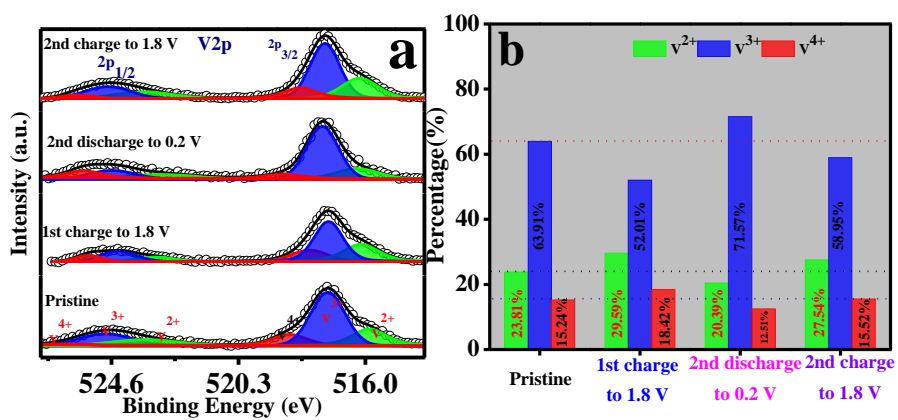



**Fig. S21** (a) Cyclic voltammograms (first three cycles) of Zn||O<sub>v</sub>-ZnV<sub>2</sub>O<sub>4</sub>-200 at 3 mV s<sup>-1</sup>, and (b) galvanostatic charge-discharge profiles at 500 mA g<sup>-1</sup>. Electrolyte: Zn (CF<sub>3</sub>SO<sub>3</sub>)<sub>2</sub> in dry acetonitrile.

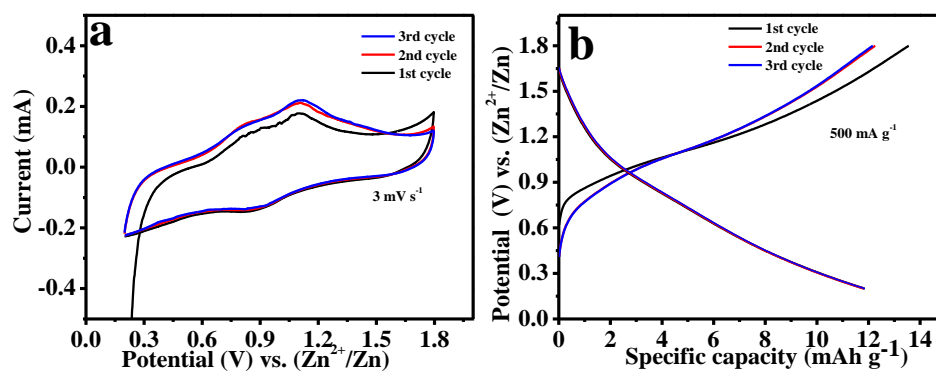

**Fig. S22** FESEM (a, d), TEM (b, e), and HRTEM (c, f) images of  $O_V\text{-ZnV}_2\text{O}_4\text{-200}$  cathode when charged to 1.8 V (a-c) and discharged to 0.2 V (d-g). STEM elemental mapping (Zn, V, O, C, S, and F) of the cathode at the discharge state (0.2 V). The inverse FFT image is shown in the inset of (f).

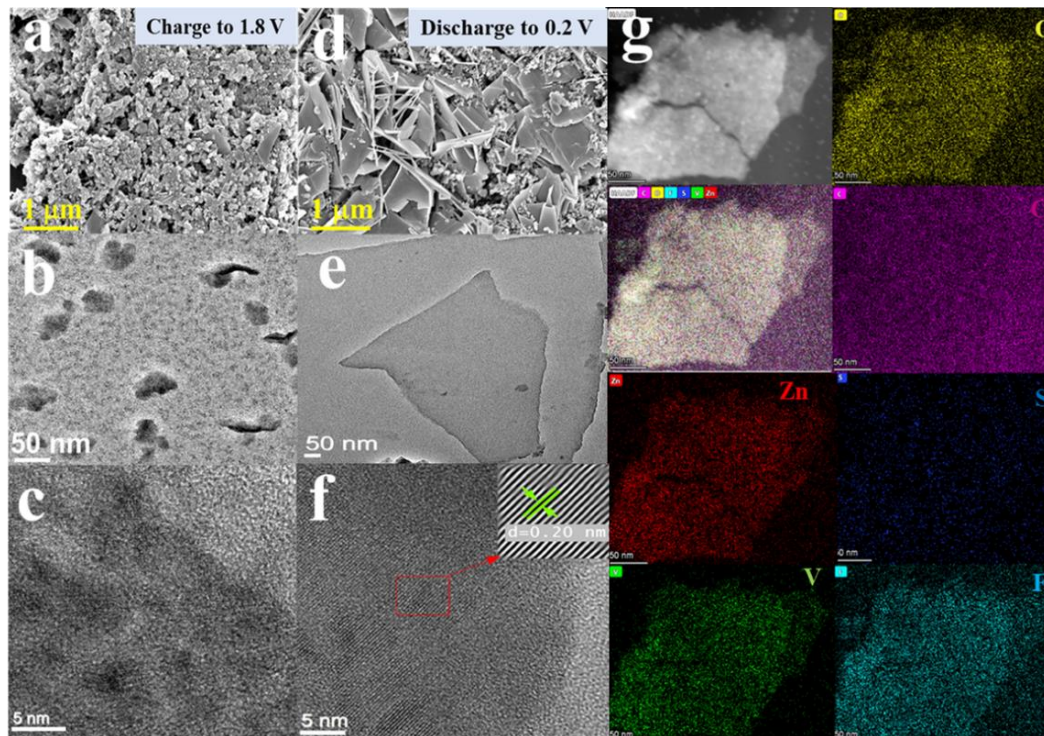

**Fig. S23** High-resolution XPS C1s profile of O<sub>v</sub>-ZnV<sub>2</sub>O<sub>4</sub>-200 cathode at pristine, fully charged, and discharged states.

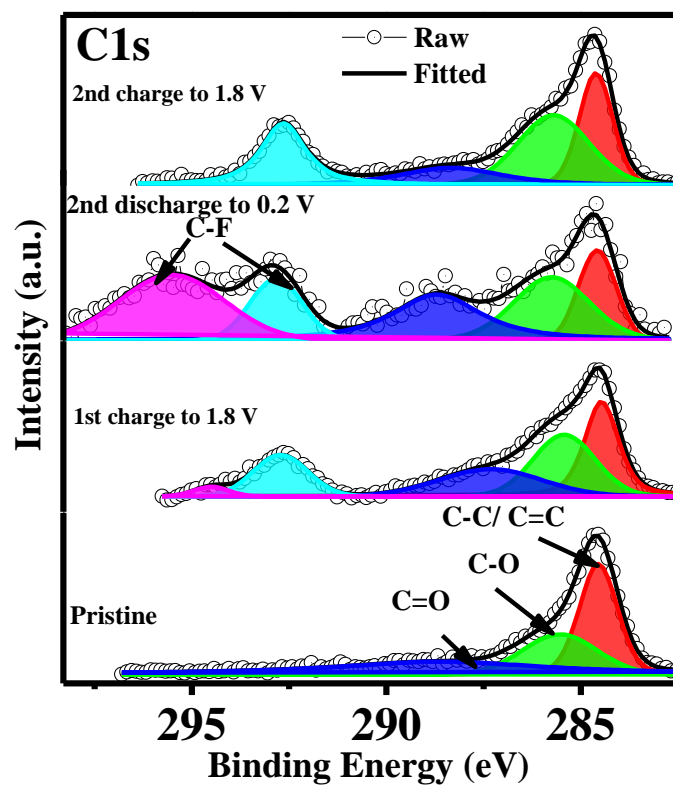

**Fig. S24** Schematic illustration of the charge-storage with  $O_v\text{-ZnV}_2\text{O}_4\text{-200}$ .

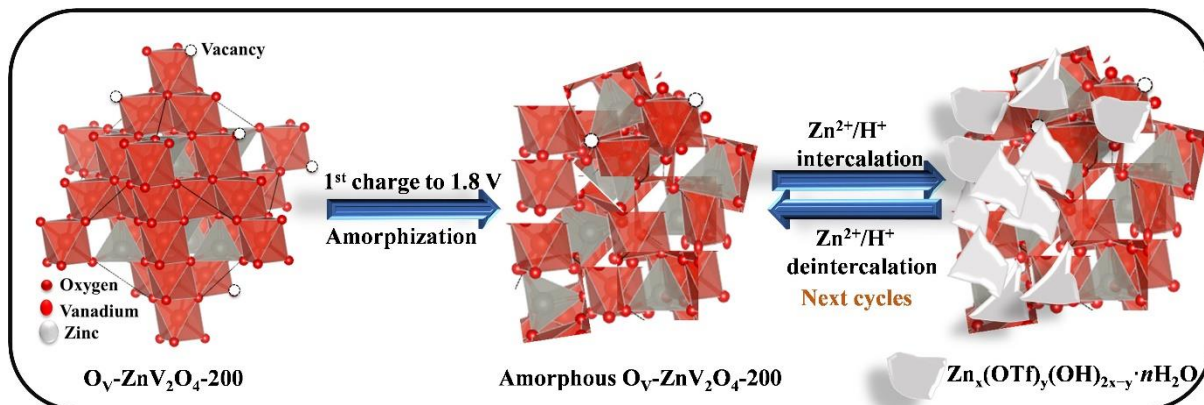

**Fig. S25** Digital photograph of OCV of a single coin cell and ZIB-powered LCD panel of digital hygrometer.

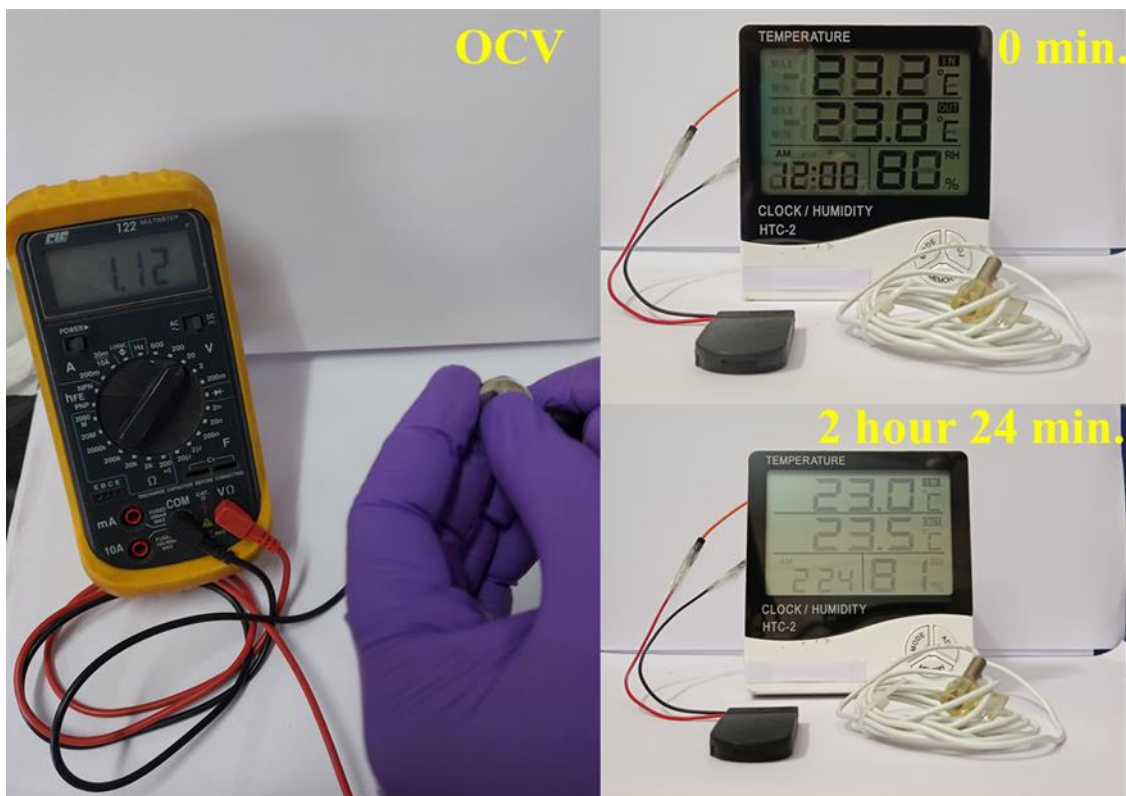

**Table S1.** ZIB performance of low valent vanadium-based spinel cathode.

| Sl No | Cathode Material                                                  | Electrolyte                                                           | Reaction mechanism                                            | Voltage (V) vs. Zn <sup>2+</sup> /Zn | Specific capacity                                  | Energy density Wh kg <sup>-1</sup> | Power density W kg <sup>-1</sup> | Capacity retention / cycles/ current density | Ref              |
|-------|-------------------------------------------------------------------|-----------------------------------------------------------------------|---------------------------------------------------------------|--------------------------------------|----------------------------------------------------|------------------------------------|----------------------------------|----------------------------------------------|------------------|
| 1     | Electroactivation-induced spinel ZnV <sub>2</sub> O <sub>4</sub>  | 2M Zn(ClO <sub>4</sub> ) <sub>2</sub>                                 |                                                               | 0.2–1.4                              | 312 mAh g <sup>-1</sup> at 0.5 C                   |                                    |                                  | 84%/ 1000/ 10 C                              | 6                |
| 2     | ZnO/ZnV <sub>2</sub> O <sub>4</sub> composite hollow microspheres | 3 M Zn(CF <sub>3</sub> SO <sub>3</sub> ) <sub>2</sub>                 |                                                               | 0.2–1.8                              | 338 mAh g <sup>-1</sup> at 100 mA g <sup>-1</sup>  | 260.8                              | 76.9                             | 79%/ 2000/ 4000 mA g <sup>-1</sup>           | 7                |
| 3     | Porous structure ZnV <sub>2</sub> O <sub>4</sub> /C-N composite   | 2 M ZnSO <sub>4</sub>                                                 |                                                               | 0.5–1.8                              | 301 mAh g <sup>-1</sup> at 300 mA g <sup>-1</sup>  |                                    |                                  | / 1000/ 200 mA g <sup>-1</sup>               | 8                |
| 4     | Act–ZnV <sub>2</sub> O <sub>4</sub>                               | 3 M ZnSO <sub>4</sub>                                                 | Insertion/extension of Zn <sup>2+</sup>                       | 0.4–1.6                              | 242 mAh g <sup>-1</sup> at 500 mA g <sup>-1</sup>  |                                    |                                  | 83%/ 2000/ 4000 mA g <sup>-1</sup>           | 9                |
| 5     | Urchin-like Spinel MgV <sub>2</sub> O <sub>4</sub>                | 2M Zn((CF <sub>3</sub> SO <sub>2</sub> ) <sub>2</sub> N) <sub>2</sub> | Insertion/extension of Zn <sup>2+</sup>                       | 0.2-1.4                              | 272 mAh g <sup>-1</sup> at 200 mA g <sup>-1</sup>  | 171.5                              | 140.6                            |                                              | 10               |
| 6     | Sea-urchin-like oxygen-deficient ZnV <sub>2</sub> O <sub>4</sub>  | 3 M Zn(CF <sub>3</sub> SO <sub>3</sub> ) <sub>2</sub>                 | Co-insertion/extension of Zn <sup>2+</sup> and H <sup>+</sup> | 0.2-1.8                              | 599.6mAh g <sup>-1</sup> at 100 mA g <sup>-1</sup> | 371.8                              | 62.1                             | 57.5%/2300/4000                              | <b>this work</b> |

## References:

- [1] Y. Li, S. Zhang, S. Wang, Z. Xiao, F. Meng, Q. Li, X. Zhang, Z. Zhang, L. Zhi, and Z. Tang, *Adv. Energy Mater.*, 2023, **13**, 2203810.
- [2] T. Wanjun, L. Yuwen, Y. Xi, and W. Cunxin, *Ind. Eng. Chem. Res.*, 2004, **43**, 2054.
- [3] Y. Zhu, T. Gao, X. Fan, F. Han and C. Wang, *Acc. Chem. Res.*, 2017, **50**, 1022–1031.
- [4] F. Ming, H. Liang, Y. Lei, S. Kandambeth, M. Eddaoudi and H. N. Alshareef, *ACS Energy Lett.*, 2018, **3**, 2602–2609.
- [5] J. Wang, J. Polleux, J. Lim and B. Dunn, *J. Phys. Chem. C*, 2007, **111**, 14925–14931.
- [6] Y. Liu, C. Li, J. Xu, M. Ou, C. Fang, S. Sun, Y. Qiu, J. Peng, G. Lu, Q. Li, J. Han and Y. Huang, *Nano Energy*, 2020, **67**, 104211.
- [7] P. Luo, W. Tang, W. Cai, J. Yang, C. Zuo, G. Liu, Y. Xiao and S. Dong, *J. Solid State Chem.*, 2021, **301**, 122371.
- [8] S. Li, L. Qin, L. Li, H. Cheng, G. Fang, S. Liang, Q. Zhu and M. Chen, *Mat. Today Commun.*, 2021, **27**, 102271.
- [9] T. Wu, K. Ni, B. Liu and S.-H. Wang, *ACS Appl. Energy Mater.*, 2022, **5**, 10196–10206.
- [10] W. Tang, B. Lan, C. Tang, Q. An, L. Chen, W.-W. Zhang, C. Zuo, and S. Dong, *ACS Sustainable Chem. Eng.*, 2020, **8**, 3681–3688.
